# Supplementary material for: Adding exogenous protein relieves the toxicity of nanoparticles to anammox granular sludge by adsorption and the formation of eco-coronas
Source: Royal Society of Chemistry journal article supplement (doi:10.1039/d1en01138c), 2022-01-01
Supplement: d1en01138c1.pdf [file d1en01138c1.pdf]

Supplementary materials for

**Adding exogenous protein relieves the toxicity of nanoparticles to anammox  
granular sludge by adsorption and the formation of eco-corona**

**Wen-Jie Ma, Xin Wang, Jiang-Tao Zhang, Jie-Yun Guo, Yan-Xu Lin, Yu-Xi Yao,**

**Gui-Feng Li, Ya-Fei Cheng, Nian-Si Fan\*, Ren-Cun Jin**

*Laboratory of Water Pollution Remediation, School of Life and Environmental  
Sciences, Hangzhou Normal University, Hangzhou 311121, China*

\*Corresponding author:

Dr. Nian-Si Fan

ORCID: 0000-0001-8640-8223

E-mail address: nsfan@hznu.edu.cn

Text 1 Methods of determining specific anammox activity (SAA).

A glass serum bottle(160 mL) was used. And the liquid volume was kept at 120 mL, which contained 5 mL anammox granular sludge, 5 mL basal mineral medium, 200 mg L<sup>-1</sup> total nitrogen and MgO NPs. The mixed solution was removed oxygen by argon gas aeration and put in a constant temperature shaker (35 °C, 180 rpm). 1 mL supernate was withdrew from bottle to determine the consumed substrate concentration every hour until the substrate was totally consumed.

**Table S1** Primers used for gene quantifications in this study.

| Category         | Target gene | Primer         | Sequence (5'-3')       | Annealing Temperature (°C) |
|------------------|-------------|----------------|------------------------|----------------------------|
| Functional genes | <i>hdh</i>  | <i>hdh</i> -F  | GGTGGTTTGAGGGGTCCAA    | 55                         |
|                  |             | <i>hdh</i> -R  | TATGGCGACCTCTGTGCATC   |                            |
|                  | <i>nirS</i> | <i>nirS</i> -F | G TSAACG TSAAGGARACSGG | 56                         |
|                  |             | <i>nirS</i> -R | GASTTCGGSTGSGTCTTGA    |                            |
|                  | <i>hzsA</i> | 1597F          | WTYGGKTATCARTATGTAG    | 55                         |
|                  |             | 1857R          | AAABGGYGAATCATARTGGC   |                            |
|                  | <i>nirK</i> | <i>nirK</i> -F | TCATGGTGCTGCCGCGKGACGG | 70                         |
|                  |             | <i>nirK</i> -R | GAACTTGCCGGTKGCCAGAC   |                            |
|                  | <i>norZ</i> | <i>norZ</i> -F | CGKTGTTTCMTCGACAGCCAG  | 53                         |
|                  |             | <i>norZ</i> -R | CGSACCTTSTTGCCSTYGCG   |                            |
|                  | <i>norB</i> | <i>norB</i> -F | ACACAAATCACTGCCGCCCA   | 65                         |
|                  |             | <i>norB</i> -R | TGCAGTACACCGGCAAAGGT   |                            |

**Table S2** Composition of the synthetic wastewater

| Composition                                  | Component                                       | Concentration  |
|----------------------------------------------|-------------------------------------------------|----------------|
| Substrate (mg L <sup>-1</sup> ) <sup>a</sup> | NaNO <sub>2</sub>                               | 70/140/210/280 |
|                                              | (NH <sub>4</sub> ) <sub>2</sub> SO <sub>4</sub> | 70/140/210/280 |
| Inorganic solution (mg L <sup>-1</sup> )     | NaH <sub>2</sub> PO <sub>4</sub>                | 10             |
|                                              | CaCl <sub>2</sub> •2H <sub>2</sub> O            | 5.6            |
|                                              | MgSO <sub>4</sub> •7H <sub>2</sub> O            | 300            |
|                                              | NaHCO <sub>3</sub>                              | 1250           |
| Trace elements (mL L <sup>-1</sup> )         | Trace elements I                                | 1.25           |
|                                              | Trace elements II                               | 1.25           |
| Trace elements I (g L <sup>-1</sup> )        | EDTA                                            | 5              |
|                                              | FeSO <sub>4</sub> •7H <sub>2</sub> O            | 9.14           |
|                                              | H <sub>3</sub> BO <sub>4</sub>                  | 0.014          |
|                                              | MnCl <sub>2</sub> •4H <sub>2</sub> O            | 0.99           |
|                                              | CuSO <sub>4</sub> •5H <sub>2</sub> O            | 0.25           |
|                                              | ZnSO <sub>4</sub> •7H <sub>2</sub> O            | 0.43           |
| Trace elements II (g L <sup>-1</sup> )       | EDTA                                            | 15             |
|                                              | CoCl <sub>2</sub> •6H <sub>2</sub> O            | 0.24           |
|                                              | NaMnO <sub>4</sub> •H <sub>2</sub> O            | 0.22           |
|                                              | NiCl <sub>2</sub> •6H <sub>2</sub> O            | 0.21           |

<sup>a</sup> The concentrations of substrates were adjusted depending on the operational performance of anammox during the experimental period.

**Table S3** Relative abundance of microbial composition at genus level in different phases

| OTU ID                                   | R01    | R02    | R03    | R04    | R11    | R12    | R13    | R14    |
|------------------------------------------|--------|--------|--------|--------|--------|--------|--------|--------|
| norank_f_norank_o_SBR1031                | 22.20% | 24.39% | 25.10% | 16.90% | 22.20% | 22.45% | 14.82% | 15.11% |
| norank_f_A4b                             | 10.26% | 11.20% | 10.98% | 9.62%  | 10.26% | 7.44%  | 9.62%  | 9.44%  |
| OLB14                                    | 0.53%  | 0.38%  | 2.78%  | 1.61%  | 0.53%  | 0.70%  | 0.39%  | 0.36%  |
| norank_f_AKYG1722                        | 1.36%  | 0.15%  | 1.34%  | 0.94%  | 1.36%  | 0.14%  | 0.90%  | 0.76%  |
| norank_f_Caldilineaceae                  | 1.10%  | 0.64%  | 0.83%  | 0.76%  | 1.10%  | 0.51%  | 0.75%  | 1.28%  |
| norank_f_JG30-KF-CM45                    | 0.95%  | 0.14%  | 1.09%  | 0.82%  | 0.95%  | 0.08%  | 0.79%  | 0.81%  |
| OLB13                                    | 1.09%  | 2.26%  | 1.91%  | 4.16%  | 1.09%  | 3.58%  | 2.52%  | 1.72%  |
| Candidatus_Kuenenia                      | 24.15% | 16.39% | 21.76% | 23.09% | 24.15% | 27.81% | 23.49% | 29.78% |
| SM1A02                                   | 3.43%  | 4.97%  | 2.10%  | 2.55%  | 3.43%  | 4.55%  | 2.64%  | 3.92%  |
| Denitratisoma                            | 4.29%  | 8.27%  | 4.90%  | 9.41%  | 4.29%  | 6.37%  | 15.58% | 11.89% |
| norank_f_norank_o_JG36-GS-52             | 1.16%  | 1.15%  | 2.12%  | 2.14%  | 1.16%  | 1.28%  | 1.05%  | 1.24%  |
| Arenimonas                               | 0.14%  | 0.25%  | 1.06%  | 1.18%  | 0.14%  | 0.41%  | 1.20%  | 0.86%  |
| Xanthobacteraceae                        | 0.67%  | 0.34%  | 0.71%  | 0.95%  | 0.67%  | 0.29%  | 1.57%  | 1.61%  |
| Limnobacter                              | 6.59%  | 4.44%  | 7.63%  | 6.29%  | 6.59%  | 4.73%  | 4.83%  | 4.04%  |
| Kapabacteriales                          | 1.25%  | 1.03%  | 0.81%  | 1.07%  | 1.25%  | 0.92%  | 0.73%  | 0.80%  |
| AKYH767                                  | 0.97%  | 0.72%  | 0.39%  | 0.76%  | 0.97%  | 0.73%  | 1.20%  | 0.76%  |
| norank_f_norank_o_norank_c_SJA-28        | 0.78%  | 1.54%  | 0.80%  | 1.20%  | 0.78%  | 1.06%  | 0.49%  | 0.70%  |
| norank_f_norank_o_norank_c_Dojkabacteria | 1.97%  | 2.53%  | 2.15%  | 3.34%  | 1.97%  | 1.94%  | 2.55%  | 2.01%  |
| Subgroup_10                              | 1.63%  | 1.72%  | 1.31%  | 0.95%  | 1.63%  | 1.15%  | 1.16%  | 0.89%  |
| Haliangium                               | 0.72%  | 3.63%  | 0.28%  | 0.39%  | 0.72%  | 1.92%  | 0.76%  | 0.57%  |
| norank_f_norank_o_Fimbriimonadales       | 1.06%  | 0.53%  | 0.35%  | 1.28%  | 1.06%  | 0.64%  | 1.24%  | 1.10%  |
| others                                   | 13.70% | 13.30% | 9.60%  | 10.59% | 13.70% | 11.28% | 11.71% | 10.35% |

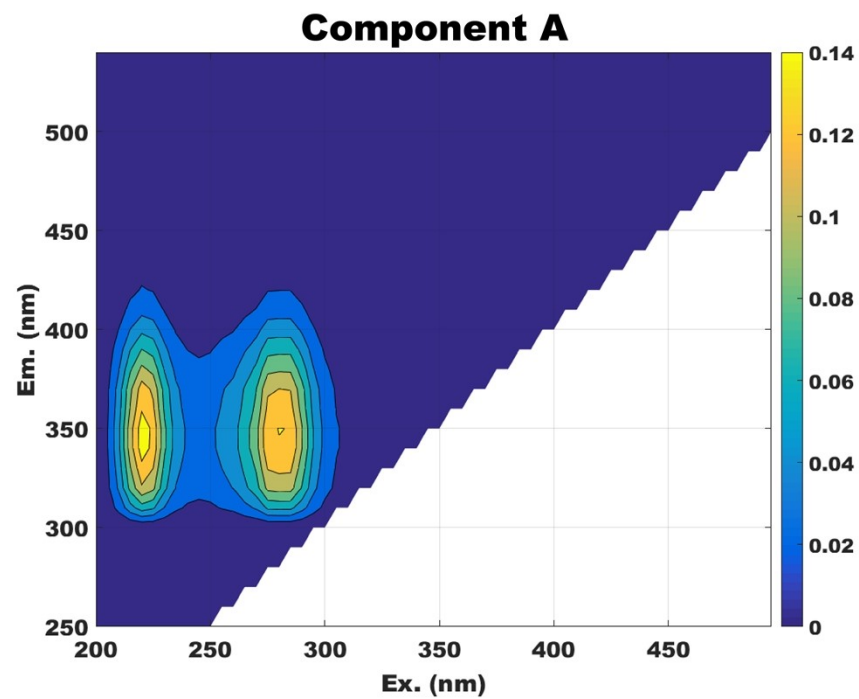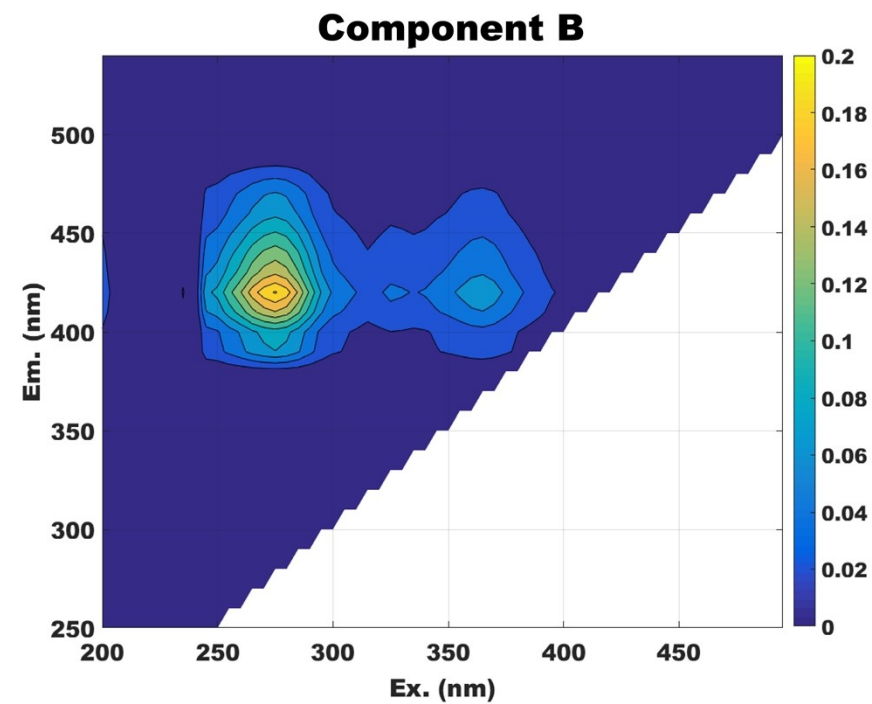

Fig. S1 The identified fluorescent components of EPS by perform parallel factor (PARAFAC)

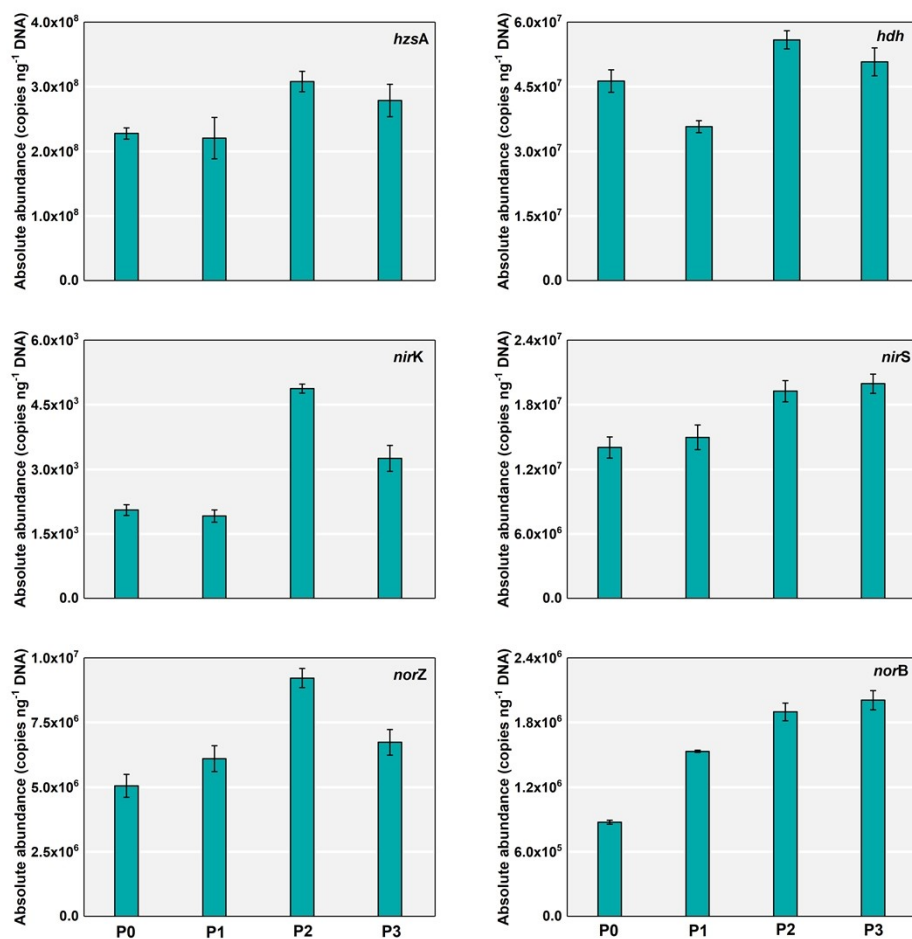

Fig. S2 Nitrogen cycle genes involved anammox (*hzsA* and *hdh*) and denitrification (*nirS*, *nirK*, *norZ* and *norB*) process in two reactors

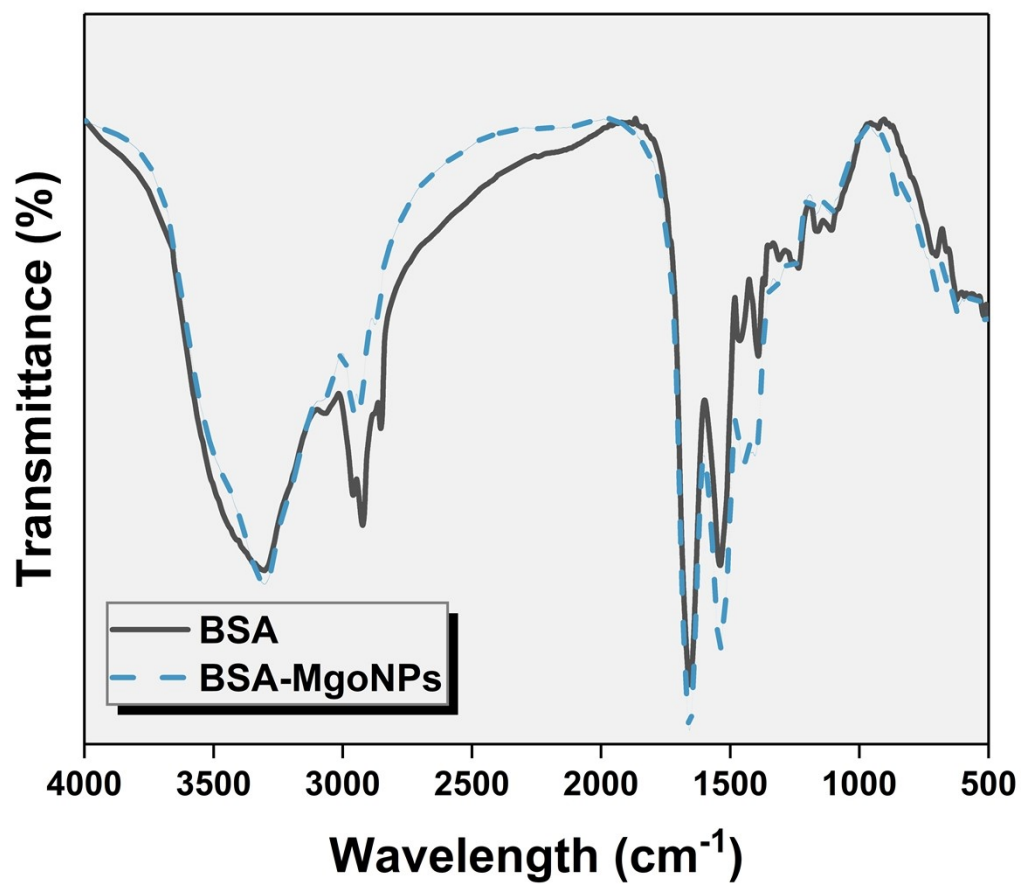

Fig. S3 FTIR absorbance spectra of the freeze-dried BSA and BSA-MgO NPs complex



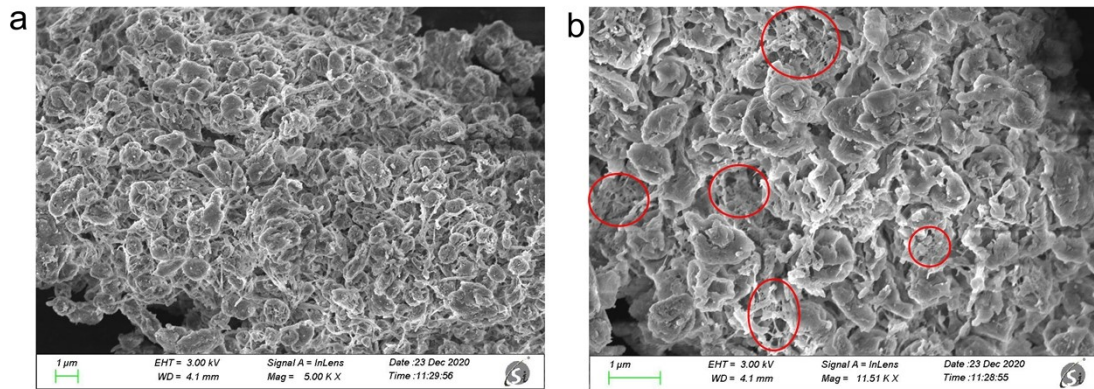

Fig. S4 Scanning electron microscope characterization of original anammox granular sludge (a) and explored by MgO NPs
